# Supplementary material for: Hippocampal granule cell dispersion: a non-specific finding in pediatric patients with no history of seizures
Source: PubMed Central journal article supplement (PMC7171777; doi:10.1186/s40478-020-00928-3), 2020-04-21
Supplement: 40478_2020_928_MOESM1_ESM.pdf [file 40478_2020_928_MOESM1_ESM.pdf]

**Supplementary Material – Additional File 1**

**Hippocampal granule cell dispersion: a non-specific finding in**

**pediatric patients with no history of seizures**

Achira Roy<sup>1</sup>, Kathleen J. Millen<sup>1,2</sup>, Raj P. Kapur<sup>1,3,4\*</sup>

<sup>1</sup>Center for Integrative Brain Research, Seattle Children's Research Institute, Seattle,

Washington, USA, email: [achira.roy@seattlechildrens.org](mailto:achira.roy@seattlechildrens.org); <sup>2</sup>Division of Genetic

Medicine, Department of Pediatrics, University of Washington, Seattle, Washington,

USA, email: [kathleen.millen@seattlechildrens.org](mailto:kathleen.millen@seattlechildrens.org); <sup>3</sup>Department of Pathology, Seattle

Children's Hospital, Seattle, Washington, USA; <sup>4</sup>Division of Pathology, University of

Washington, Seattle, Washington, USA, email: [raj.kapur@seattlechildrens.org](mailto:raj.kapur@seattlechildrens.org)

\*Correspondence: Raj P. Kapur, MD, PhD

Department of Laboratories, OC.8.720

Seattle Children's Hospital

4800 Sand Point Way NE

Seattle, WA, USA. ZIP: 98105

Email: [raj.kapur@seattlechildrens.org](mailto:raj.kapur@seattlechildrens.org)

Tel: +1-206-987-2103

24 **Short Title:** Granule cell dispersion in control human dentate gyri

25

26 **Number of Supplementary Figures: 6**

27 **Number of Supplementary Tables: 2**

28

29

30

31

32

33

34

35

36

37

38

39

40

41

42

43

44

45

46

47 **Supplementary Files**

48 **Supplementary Table 1: List of patients evaluated with**  
49 **immunohistochemistry/immunofluorescence**

50 This table exclusively includes demographic features of those patients, whose cadaveric  
51 hippocampal samples were evaluated with immunohistochemistry/immunofluorescence.  
52 Additional information about the clinical history of patients listed in this table is available  
53 in Tables 1,2 and Additional File 2. PMI, post-mortem interval; GW, gestational weeks;  
54 GCD, granule cell dispersion; mo, month(s).

55

56 **Supplementary Table 2: List of seizure patients and controls in published reports**  
57 **of GCD**

58 Published reports of GCD were studied; and the number and nature of hippocampal  
59 samples from epileptic patients and controls are tabulated along with respective age, if  
60 specified. Percentage of epileptic cases or controls demonstrating GCD is also  
61 mentioned. This table only includes reports that have at least performed a subjective  
62 assessment of the hippocampal pathology. Number of controls specified for each study  
63 categorically denotes the ones which do not have any history of seizures. We note that  
64 these studies included very few non-seizure controls. Other types of “controls” used  
65 have been mentioned in the comment section. PM, post-mortem.

66

67

68

69

70 **Supplementary Figures:**

71 **Supplementary Fig. 1: Control hippocampi demonstrate variable severities of**

72 **GCD**

73 **(a)** Schematic of a coronal section of human hippocampus. **(b-l')** H&E-stained images  
74 of coronal hippocampal sections of control human cadavers with no history of seizures,  
75 demonstrating GCD. The areas within the dotted boxes were magnified (b', c', d', e', f',  
76 g', h', i', j', k', l') to demonstrate the presence of GCD, as "tram-track" (TT),  
77 disaggregated (DA) or both. Arrowhead, outer granular zone distal to hilus; open  
78 arrowhead, inner granular zone proximal to hilus; bv, blood vessel. Scale bars: 1mm (b,  
79 c, d, e, f, g, h, i, j, k, l), 50 $\mu$ m (b', c', d', e', f', g', h', i', j', k', l').

80

81 **Supplementary Fig. 2: GCD occurs independent of different clinical parameters in**  
82 **patients with or without epileptic history**

83 **(a)** Percentage of control hippocampi having GCD (white bars) was not significantly  
84 different from that of epileptic hippocampi with GCD (red bars), across corrected age  
85 groups ( $p > 0.2$ ; age 0 corresponds to term delivery or 40 gestational weeks). Proportion  
86 for each group is marked in brackets. **(b)** Statistical analyses across binned post-  
87 mortem intervals showed no significant difference in the percentage of GCD and non-  
88 GCD groups with respect to PMI, in both controls and seizure cases. **(c, c')** Maximum  
89 thicknesses of control and epileptic "tram-track" (TT), disaggregated (DA) and compact  
90 GC layers were plotted across ages of death. No significant correlation of compact and  
91 DA thicknesses was observed with age or between control and seizure cases. Seizure  
92 TT thickness demonstrated a slightly positive correlation with age of death, beyond 60

93 weeks ( $R^2=0.4517$ ,  $p=0.0167$ ). Compared to compact, DA and TT layer thicknesses  
94 were significantly higher for both seizure cases and controls across ages. For better  
95 visualization of younger samples, plot of GC layer thickness in patients who died  
96 between -20 to +20 weeks of age (rectangle), is magnified in c'. (d) Proportion of GCD  
97 in controls was similar to that in seizure cases across several clinical diagnoses, as  
98 analyzed from patients' clinical history. (e) No significant difference in the proportion of  
99 total DG length that developed GCD was observed between control and epileptic  
100 hippocampi ( $p=0.801$ ,  $t=0.2557$ ,  $df=18.55$ ). Data are represented as 100% bar graphs  
101 (a), 100% stacked columns (b), scatter plots (c, c'), normalized grouped columns (d) or  
102 scatter plot with mean  $\pm$ SEM (e). Statistical analyses performed were two-way ANOVA,  
103 followed by Tukey post-hoc test (a, b, d), linear regression fit (c, c') and Welch-corrected  
104 t-test (e). Differences were considered significant at  $p<0.05$ ; ns, non-significant.

105

106 **Supplementary Fig. 3: Distribution of neural progenitors is similar in cadaveric**  
107 **controls and seizure cases with GCD**

108 SOX2 (a-c, j, k), PAX6 (d-f, l, m), TBR2 (g-i, n, o) are expressed in the nuclei of neural  
109 progenitors. Immunohistochemistry of SOX2, PAX6 and TBR2 demonstrated no ectopic  
110 presence of progenitors in the GCD-ed dentate gyri of either control or epileptic brains.  
111 Blood vessels (bv) also express SOX2, PAX6 and TBR2. Fluorescence observed in the  
112 cytoplasm of some brain samples reflects artefacts owing to the fixed cadaveric tissue  
113 quality and non-specific antibody staining. TT, tram-track; DA, disaggregated;  
114 arrowhead, outer granular zone distal to hilus; open arrowhead, inner granular zone  
115 proximal to hilus; white arrow, TBR2<sup>+</sup> nucleus. Scalebars: 50 $\mu$ m (a-o).

116

117 **Supplementary Fig. 4: Cadaveric control and seizure brains do not show**

118 **differential activation of macrophages and microglia**

119 CD68 (**a-e, k-o**) and IBA1 (**f-j, p-t**) are generic markers of macrophages and microglia

120 respectively, which get activated in response to tissue injury. Although some

121 hippocampal samples exhibited a few IBA1<sup>+</sup> activated, rounded or bushy microglia

122 (white arrow; f, g, i, j, p, s, t), no overt differential expression of CD-68 or IBA1 was

123 observed between control and epileptic brains. IBA1 staining in SZ-1 showed some

124 non-specific artefacts due to cell autolysis (h). TT, tram-track; DA, disaggregated;

125 arrowhead, outer granular zone distal to hilus; open arrowhead, inner granular zone

126 proximal to hilus; black arrow, CD68<sup>+</sup> cell. Scalebars: 50 $\mu$ m (a-t).

127

128 **Supplementary Fig. 5: GCD severity varies across sectioning planes in both**

129 **control and seizure brains**

130 Two H&E-stained coronal sections from different antero-posterior levels of human

131 control (C-11; **a, b**) and epileptic (SZ-1; **c, d**) hippocampi were analyzed. Insets showed

132 the presence of GCD, especially “tram-track” (TT) subtype, in one section (**a', a'', c', c''**)

133 but not in the other (**b', b'', d', d''**), for both control and epileptic brains. DA,

134 disaggregated; C, compact; arrowhead, outer granular zone distal to hilus; open

135 arrowhead, inner granular zone proximal to hilus. Scalebars: 1mm (a, b, c, d); 200 $\mu$ m

136 (**a', a'', b', b'', c', c'', d', d''**).

137

138

139 **Supplementary Fig. 6: Alternative assessment method for GCD – averaging**  
140 **across measurements fails to resolve focal forms of GCD**

141 (a, b) Panels depict the same microscopic field of control hippocampus C-20. (a) Focal  
142 DA zones are illustrated in the GC layer, as suggested by [4], adopted by many others  
143 [1,16] and also applied in our study. (b) A contrasting morphometric approach has been  
144 exemplified here, similar to that used by [8,13,15], whereby the average thickness of the  
145 dentate GC layer is calculated by taking multiple measurements and GCD is diagnosed  
146 only if this value is above the range found in controls. Mean thickness calculated from  
147 the measurements in (b) including focal DA regions was statistically not different from  
148 that without the DA measurements; the former average had a higher standard deviation  
149 as expected. While the latter approach may seem more rigorous, selection of “straight”  
150 fields for averaging is subjective, with a tendency of deliberately excluding foci of DA or  
151 TT unless they significantly shift the mean thickness.

**Supplementary Table 1: List of patients evaluated with immunohistochemistry/immunofluorescence**

| Code/Group                        | Age of death (GW) | Corrected age of death | Gender | PMI       | Seizure (Y/N) | Seizure onset (interval before death)                                  | GCD (Y/N)                    |
|-----------------------------------|-------------------|------------------------|--------|-----------|---------------|------------------------------------------------------------------------|------------------------------|
| <b>Seizure cases with GCD:</b>    |                   |                        |        |           |               |                                                                        |                              |
| SZ-1 <sup>a</sup>                 | 7days             | 7days                  | M      | 12 h      | Y             | <24 h                                                                  | Y                            |
| SZ-3 <sup>a</sup>                 | 16years           | 16years                | F      | 22 h      | Y             | 13years                                                                | Y                            |
| SZ-4 <sup>b</sup>                 | 6years            | 6years                 | M      | not known | Y             | >5years; multiple episodes till death, intractable                     | Y                            |
| SZ-8 <sup>a</sup>                 | 18mo              | 18mo                   | M      | 26 h      | Y             | 1-3 months of age; no further seizures post-treatment of phenobarbital | Y                            |
| SZ-10 <sup>a</sup>                | 5weeks (28GW)     | 33GW                   | F      | 17.5 h    | Y             | <24 h                                                                  | Y                            |
| <b>Seizure cases without GCD:</b> |                   |                        |        |           |               |                                                                        |                              |
| SZ-2 <sup>a</sup>                 | 6years            | 6years                 | F      | 10 h      | Y             | 6years; intractable                                                    | N                            |
| <b>Controls with GCD:</b>         |                   |                        |        |           |               |                                                                        |                              |
| C-1 <sup>a</sup>                  | 1day (37GW)       | 37GW                   | F      | 14 h      | N             | N                                                                      | Y (focal DA, mostly compact) |
| C-2A, C-2B <sup>a</sup>           | 4weeks (27GW)     | 31GW                   | M      | 32 h      | N             | N                                                                      | Y                            |
| C-3 <sup>a</sup>                  | 3weeks (26GW)     | 29GW                   | M      | 23 h      | N             | N                                                                      | Y                            |
| C-4 <sup>a</sup>                  | 3weeks            | 3weeks                 | F      | 57.5 h    | N             | N                                                                      | Y                            |



|                   |                |         |   |         |   |   |   |
|-------------------|----------------|---------|---|---------|---|---|---|
| C-14 <sup>a</sup> | 2mo (term)     | 8weeks  | F | 20 h    | N | N | Y |
| C-16 <sup>a</sup> | 10weeks (32GW) | 2weeks  | M | 11 h    | N | N | Y |
| C-17 <sup>a</sup> | 23days (25GW)  | 28GW    | M | 16.25 h | N | N | Y |
| C-18 <sup>a</sup> | 6years         | 6years  | F | 68 h    | N | N | Y |
| C-19 <sup>a</sup> | 6years         | 6years  | M | 15 h    | N | N | Y |
| C-25 <sup>a</sup> | 17years        | 17years | M | 59 h    | N | N | Y |

<sup>a</sup> based on microscopic evaluation of archived hippocampal sections

<sup>b</sup> case published in [14,2]; unused right hemisphere was obtained from SCH morgue and pathological studies were done by RPK on the right hippocampus for the first time for this study

**Supplementary Table 2: List of seizure patients and controls in published reports of GCD <sup>a</sup>**

| Study<br>[References]            | Seizure Patients                               |                      |             | Non-Seizure Controls* |                   |          | Comment                                                                                                                                                                                                     |
|----------------------------------|------------------------------------------------|----------------------|-------------|-----------------------|-------------------|----------|-------------------------------------------------------------------------------------------------------------------------------------------------------------------------------------------------------------|
|                                  | Total                                          | Age Range            | GCD (%)     | Total                 | Age Range         | GCD (%)  |                                                                                                                                                                                                             |
| Houser, 1990 [10]                | 15 (surgical)                                  | 18-46 years          | 11 (73.33%) | 6 (PM)                | 44-77 years       | 0 (0%)   | Both DA and TT subtypes included. Number of sections analyzed were ~20 per brain.                                                                                                                           |
| Lurton <i>et al.</i> , 1997 [11] | 17 (surgical)                                  | 11-37 years          | 8 (47.06%)  | 4 (PM)                | >37 years         | 0 (0%)   | Number of sections studied per patient not specified.                                                                                                                                                       |
| El Bahh <i>et al.</i> , 1999 [6] | 20 (surgical)                                  | 27 ± 8 years         | 9 (45%)     | 2<br>(surgical)       | not specified     | 0 (0%)   | 2 tumor resections were taken as controls (age: 48y, 69y). Number of sections studies was not specified.                                                                                                    |
| Harding and Thom,<br>2001 [9]    | 1 (PM)                                         | 2.5 years            | 1           | 2 (PM)                | 12-20 weeks       | 2 (100%) | Bilateral GCD observed in an epileptic patient and 2 controls. <i>Only study that reported GCD in controls.</i>                                                                                             |
| Thom <i>et al.</i> , 2002 [18]   | 206 (surgical):<br>183 (HS), 23<br>(TL lesion) | 15-58 years          | ~81%        | 6 (PM)                | not specified     | 0 (0%)   | Only DA subtype was considered as "GCD" in this study. However, TT subtype was observed in 10.3% of patients. ~10 consecutive sections with 4mm interval were studied from both seizure and control samples |
| Thom <i>et al.</i> , 2005 [17]   | 20 (surgical)                                  | 17-48 years          | 14 (70%)    | 5 (PM)                | 34-85 years       | 0 (0%)   | -                                                                                                                                                                                                           |
| Blumcke <i>et al.</i> , 2007 [5] | 178 (surgical)                                 | 38.4 ± 13<br>years   | 79 (44.38%) | 8 (PM)                | 49 ± 6.8<br>years | 0 (0%)   | 10% neuronal loss was found within the first standard deviation of age-matched control individuals.                                                                                                         |
| Blumcke <i>et al.</i> , 2009 [4] | 96 (surgical)                                  | 38.2 ± 13.5<br>years | 49 (51.04%) | 0                     | -                 | -        | 11 "no-GCP" epilepsy cases were considered as "controls".                                                                                                                                                   |
| Bae <i>et al.</i> , 2010 [3]     | 26 (surgical)                                  | 16-43 years          | 20 (76.92%) | 0                     | -                 | -        | Number of sections studied per patient not specified.                                                                                                                                                       |

|                                   |               |             |             |                         |               |        |                                                                                                                                                   |
|-----------------------------------|---------------|-------------|-------------|-------------------------|---------------|--------|---------------------------------------------------------------------------------------------------------------------------------------------------|
| Marucci <i>et al.</i> , 2010 [12] | 14 (surgical) | 19-54 years | 7 (50%)     | 0                       | -             | -      | -                                                                                                                                                 |
| Abraham <i>et al.</i> , 2011 [1]  | 28 (surgical) | 17-61 years | 16 (57.14%) | 8 (3 PM,<br>5 surgical) | not specified | 0 (0%) | 5 out of 8 "controls" have temporal lobe tumors. Number of immuno-stained sections studied varied from 3 to 9 per patient.                        |
| Freiman <i>et al.</i> , 2011 [7]  | 10 (surgical) | 31-50 years | 4 (40%)     | 0                       | -             | -      | Intact portions ("compact") of TLE GC layer were used as internal controls.<br><br>Number of sections studied per patient varied between 1 and 6. |

<sup>a</sup> List comprises of studies that have used some variation of Blumcke *et al.* (2009) classification of GCD [4], like ours. Reports that used exclusively the approach of averaging GC layer thickness to determine the existence of GCD were excluded from this list.

## References

1. Abraham H, Richter Z, Gyimesi C, Horvath Z, Janszky J, Doczi T, Seress L (2011) Degree and pattern of calbindin immunoreactivity in granule cells of the dentate gyrus differ in mesial temporal sclerosis, cortical malformation- and tumor-related epilepsies. *Brain Res* 1399:66-78. doi:10.1016/j.brainres.2011.05.010
2. Alcantara D, Timms AE, Gripp K, Baker L, Park K, Collins S, Cheng C, Stewart F, Mehta SG, Saggari A, Sztriha L, Zombor M, Caluseriu O, Mesterman R, Van Allen MI, Jacquinet A, Ygberg S, Bernstein JA, Wenger AM, Gudur H, Bejerano G, Gomez-Ospina N, Lehman A, Alfei E, Pantaleoni C, Conti V, Guerrini R, Moog U, Graham JM, Jr., Hevner R, Dobyns WB, O'Driscoll M, Mirzaa GM (2017) Mutations of AKT3 are associated with a wide spectrum of developmental disorders including extreme megalencephaly. *Brain* 140:2610-2622. doi:10.1093/brain/awx203
3. Bae EK, Jung KH, Chu K, Lee ST, Kim JH, Park KI, Kim M, Chung CK, Lee SK, Roh JK (2010) Neuropathologic and clinical features of human medial temporal lobe epilepsy. *Journal of clinical neurology* 6:73-80. doi:10.3988/jcn.2010.6.2.73
4. Blumcke I, Kistner I, Clusmann H, Schramm J, Becker AJ, Elger CE, Bien CG, Merschhemke M, Meencke HJ, Lehmann T, Buchfelder M, Weigel D, Buslei R, Stefan H, Pauli E, Hildebrandt M (2009) Towards a clinico-pathological classification of granule cell dispersion in human mesial temporal lobe epilepsies. *Acta Neuropathol* 117:535-544. doi:10.1007/s00401-009-0512-5
5. Blumcke I, Pauli E, Clusmann H, Schramm J, Becker A, Elger C, Merschhemke M, Meencke HJ, Lehmann T, von Deimling A, Scheiwe C, Zentner J, Volk B, Romstock J, Stefan H, Hildebrandt M (2007) A new clinico-pathological classification system for mesial temporal sclerosis. *Acta Neuropathol* 113:235-244. doi:10.1007/s00401-006-0187-0
6. El Bahh B, Lespinet V, Lurton D, Coussemacq M, Le Gal La Salle G, Rougier A (1999) Correlations between granule cell dispersion, mossy fiber sprouting, and hippocampal cell loss in temporal lobe epilepsy. *Epilepsia* 40:1393-1401. doi:10.1111/j.1528-1157.1999.tb02011.x

7. Freiman TM, Eismann-Schweimler J, Frotscher M (2011) Granule cell dispersion in temporal lobe epilepsy is associated with changes in dendritic orientation and spine distribution. *Exp Neurol* 229:332-338. doi:10.1016/j.expneurol.2011.02.017
8. Haas CA, Dudeck O, Kirsch M, Huszka C, Kann G, Pollak S, Zentner J, Frotscher M (2002) Role for reelin in the development of granule cell dispersion in temporal lobe epilepsy. *J Neurosci* 22:5797-5802. doi:20026621
9. Harding B, Thom M (2001) Bilateral hippocampal granule cell dispersion: autopsy study of 3 infants. *Neuropathology and applied neurobiology* 27:245-251
10. Houser CR (1990) Granule cell dispersion in the dentate gyrus of humans with temporal lobe epilepsy. *Brain Res* 535:195-204
11. Lurton D, Sundstrom L, Brana C, Bloch B, Rougier A (1997) Possible mechanisms inducing granule cell dispersion in humans with temporal lobe epilepsy. *Epilepsy Res* 26:351-361. doi:10.1016/s0920-1211(96)01002-9
12. Marucci G, Rubboli G, Giulioni M (2010) Role of dentate gyrus alterations in mesial temporal sclerosis. *Clinical neuropathology* 29:32-35. doi:10.5414/npp29032
13. Mathern GW, Kuhlman PA, Mendoza D, Pretorius JK (1997) Human fascia dentata anatomy and hippocampal neuron densities differ depending on the epileptic syndrome and age at first seizure. *Journal of neuropathology and experimental neurology* 56:199-212. doi:10.1097/00005072-199702000-00011
14. Riviere JB, Mirzaa GM, O'Roak BJ, Beddaoui M, Alcantara D, Conway RL, St-Onge J, Schwartzentruber JA, Gripp KW, Nikkel SM, Worthylake T, Sullivan CT, Ward TR, Butler HE, Kramer NA, Albrecht B, Armour CM, Armstrong L, Caluseriu O, Cytrynbaum C, Drolet BA, Innes AM, Lauzon JL, Lin AE, Mancini GM, Meschino WS, Reggin JD, Saggar AK, Lerman-Sagie T, Uyanik G, Weksberg R, Zirn B, Beaulieu CL, Majewski J, Bulman DE, O'Driscoll M, Shendure J, Graham JM, Jr., Boycott KM, Dobyns WB (2012) De novo germline and postzygotic mutations in AKT3, PIK3R2 and PIK3CA cause a spectrum of related megalencephaly syndromes. *Nat Genet* 44:934-940. doi:10.1038/ng.2331
15. Somani A, Zborovschi AB, Liu Y, Patodia S, Michalak Z, Sisodiya SM, Thom M (2019) Hippocampal morphometry in sudden and unexpected death in epilepsy. *Neurology* 93:e804-e814. doi:10.1212/WNL.0000000000007969
16. Thom M (2014) Review: Hippocampal sclerosis in epilepsy: a neuropathology review. *Neuropathology and applied neurobiology* 40:520-543. doi:10.1111/nan.12150
17. Thom M, Martinian L, Williams G, Stoeber K, Sisodiya SM (2005) Cell proliferation and granule cell dispersion in human hippocampal sclerosis. *Journal of neuropathology and experimental neurology* 64:194-201. doi:10.1093/jnen/64.3.194
18. Thom M, Sisodiya SM, Beckett A, Martinian L, Lin WR, Harkness W, Mitchell TN, Craig J, Duncan J, Scaravilli F (2002) Cytoarchitectural abnormalities in hippocampal sclerosis. *Journal of neuropathology and experimental neurology* 61:510-519. doi:10.1093/jnen/61.6.510

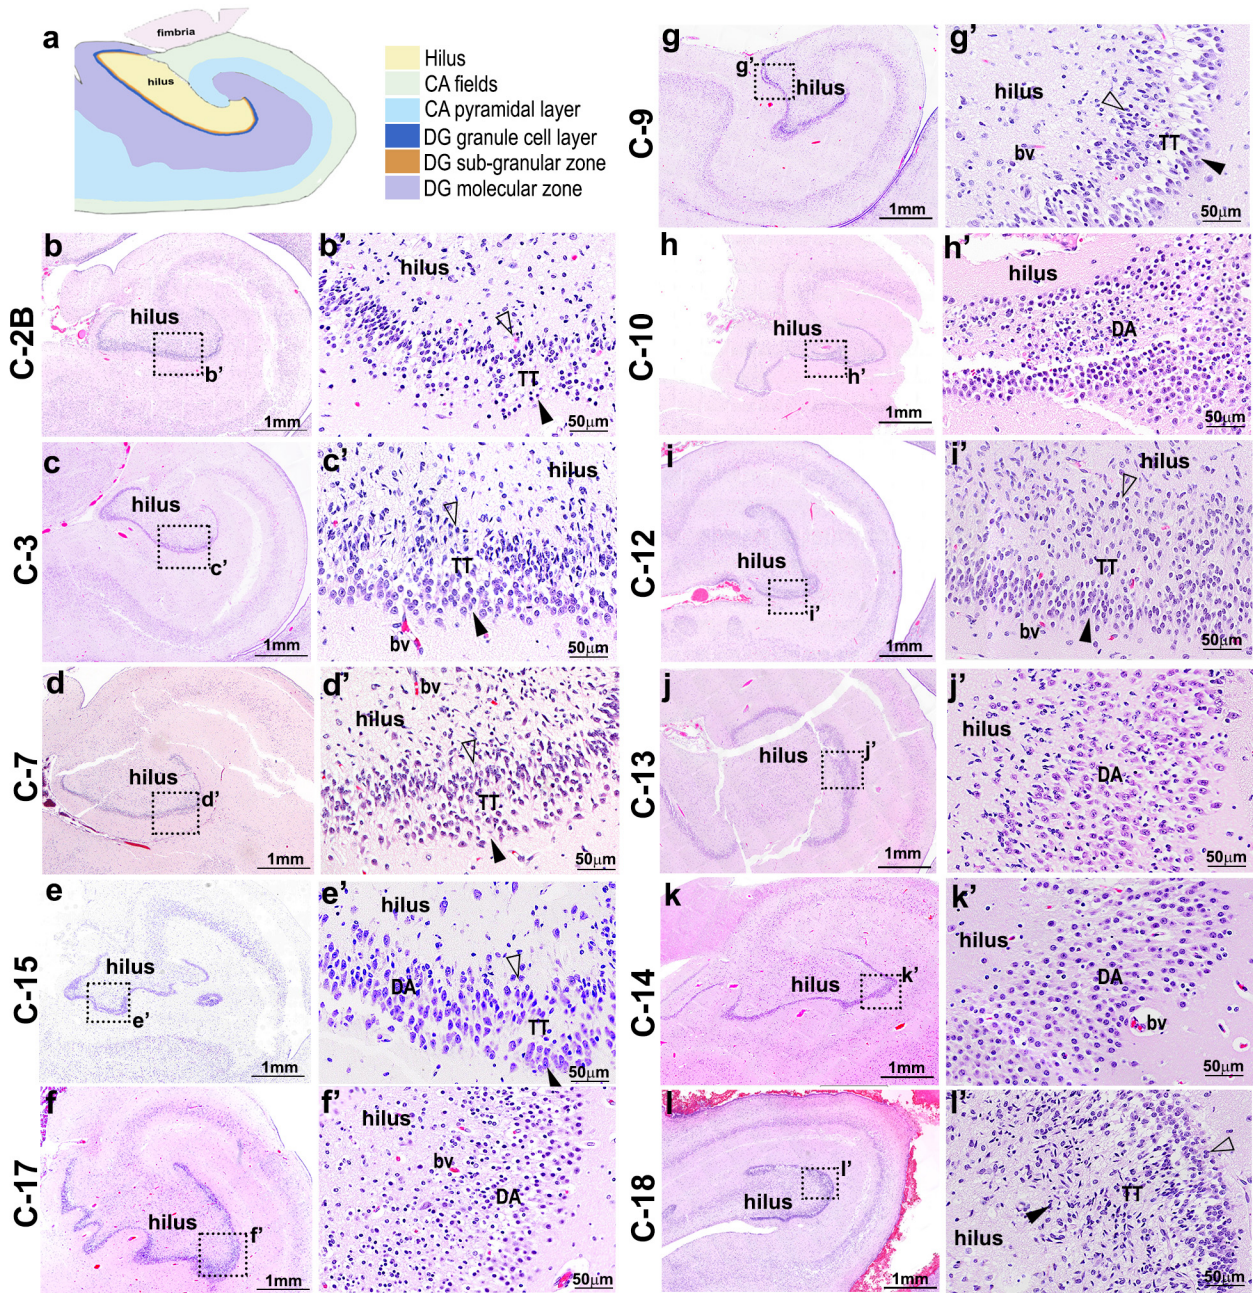

Supplementary Fig. 1

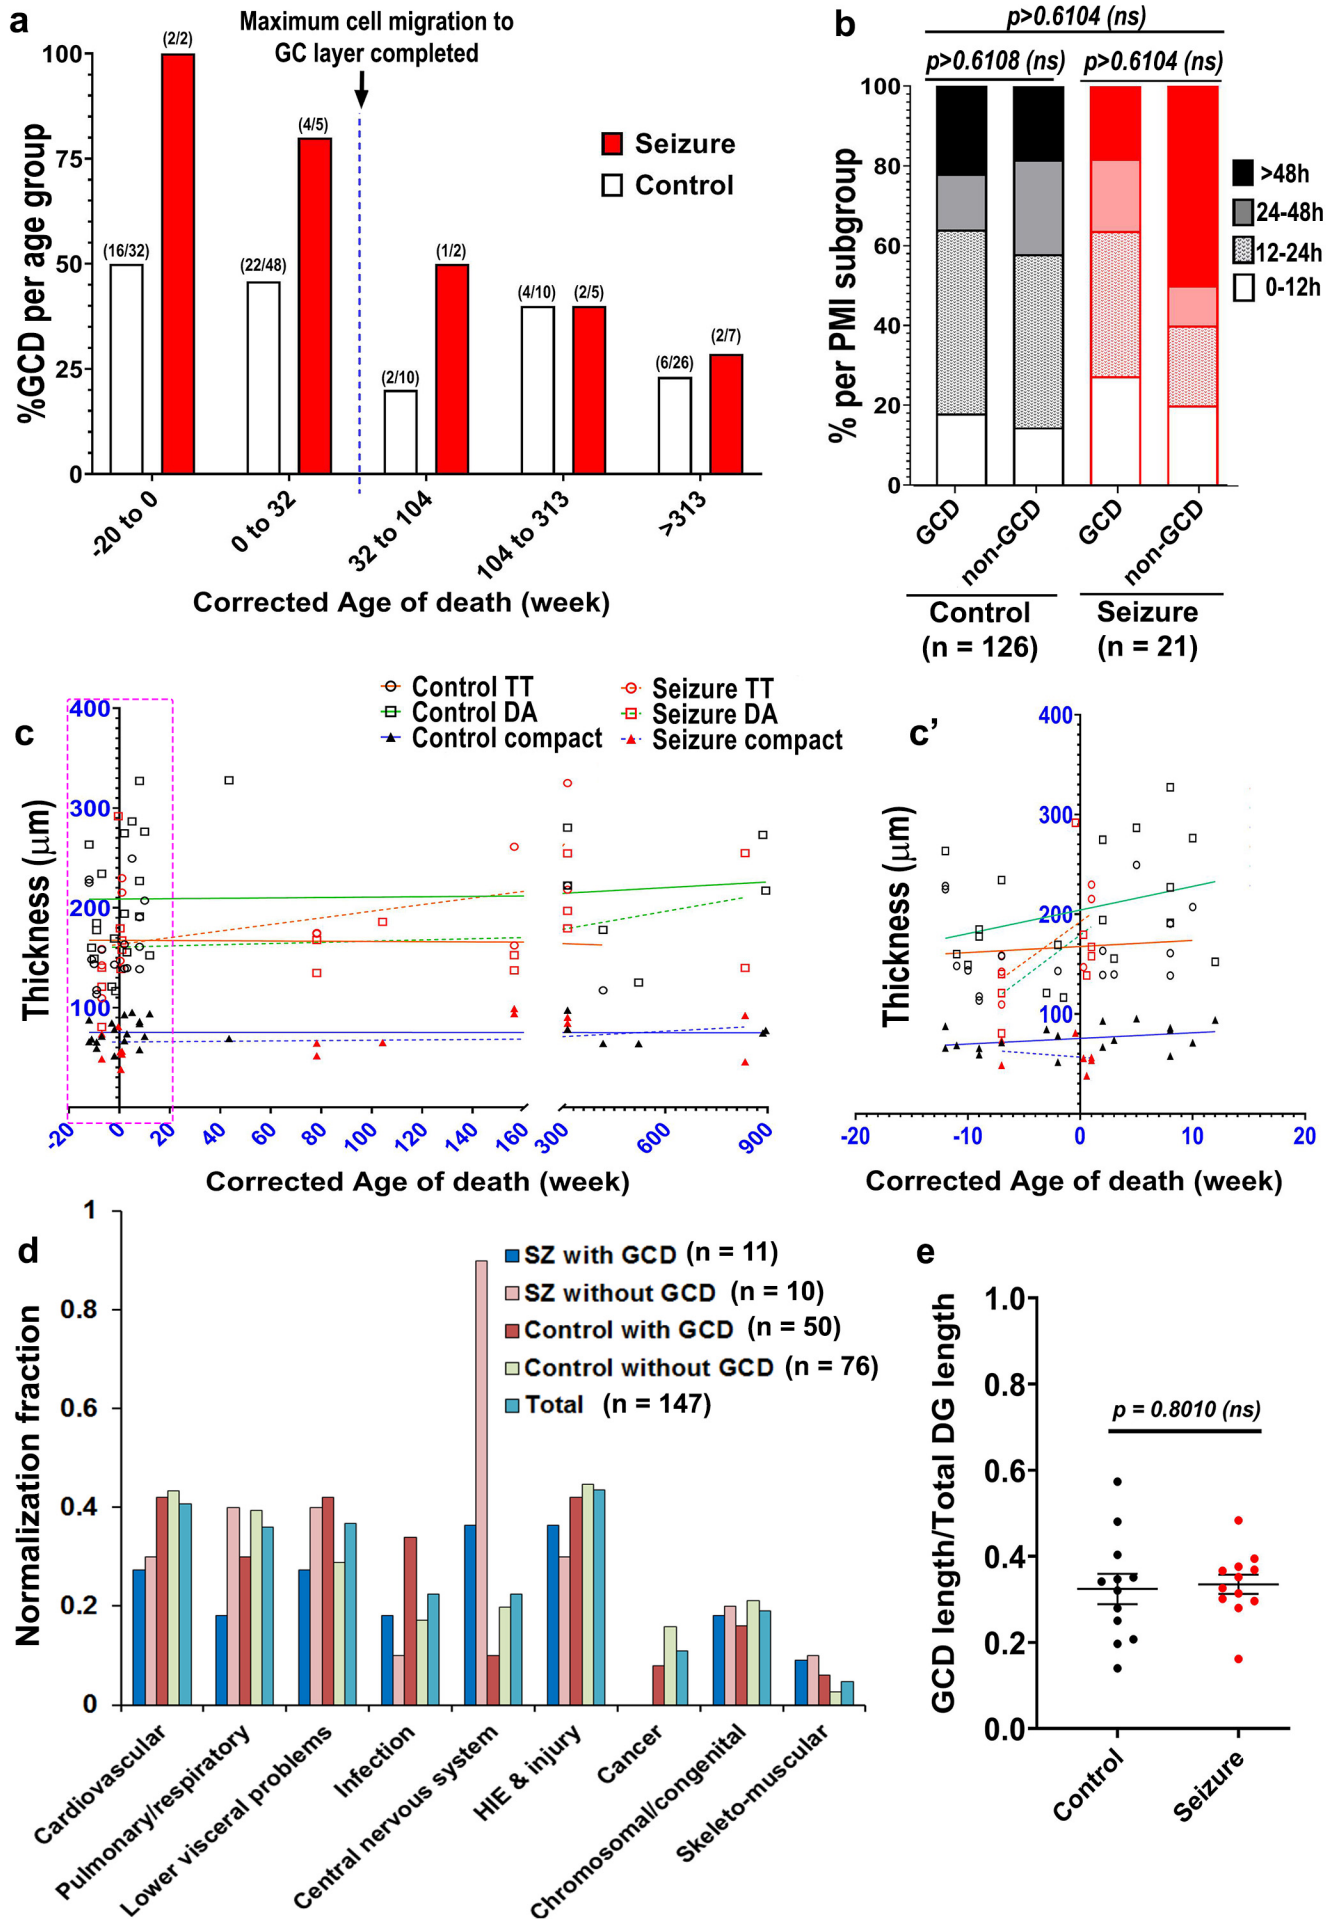

Supplementary Fig. 2

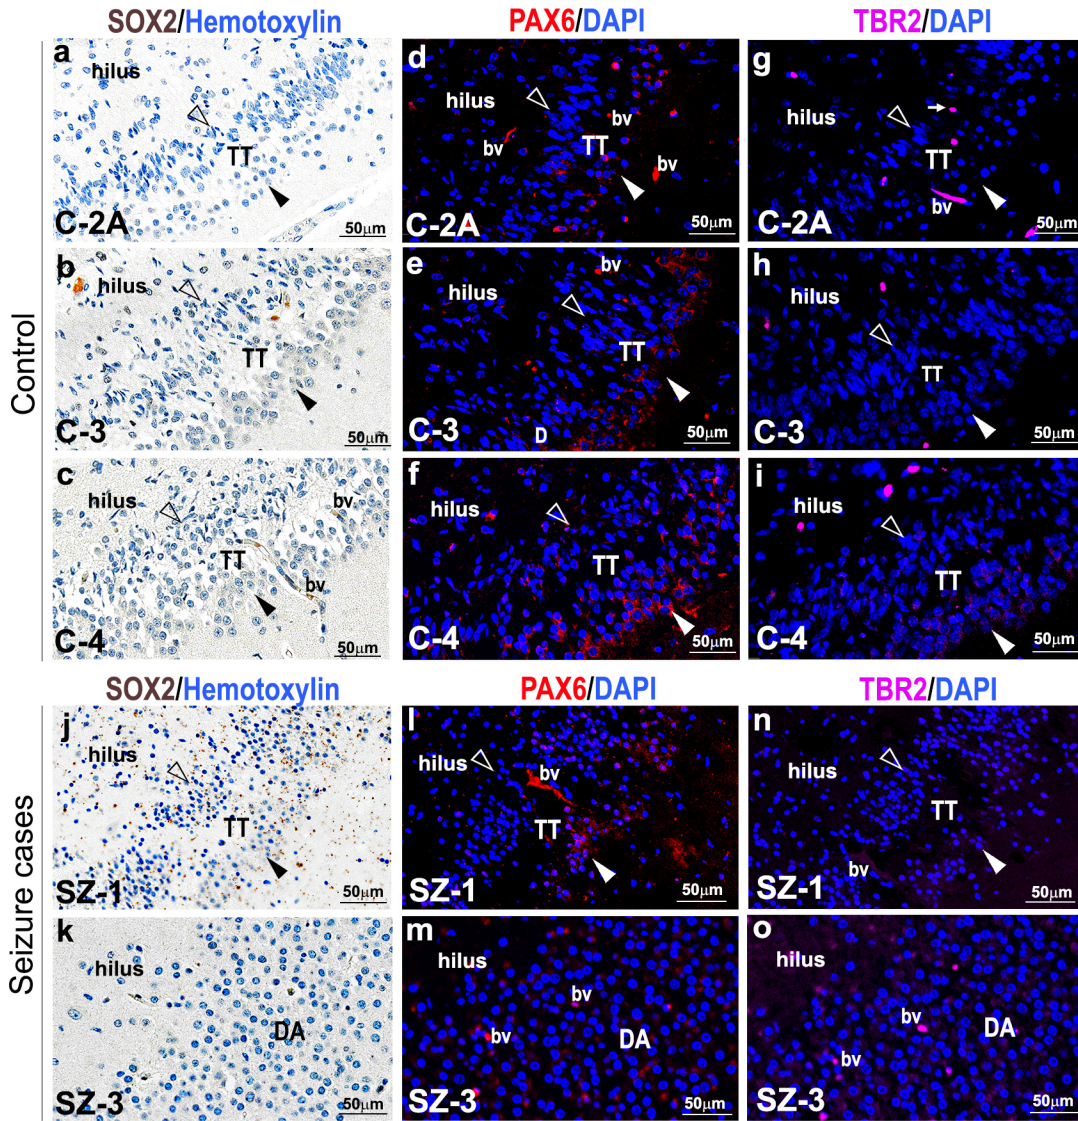

Supplementary Fig. 3

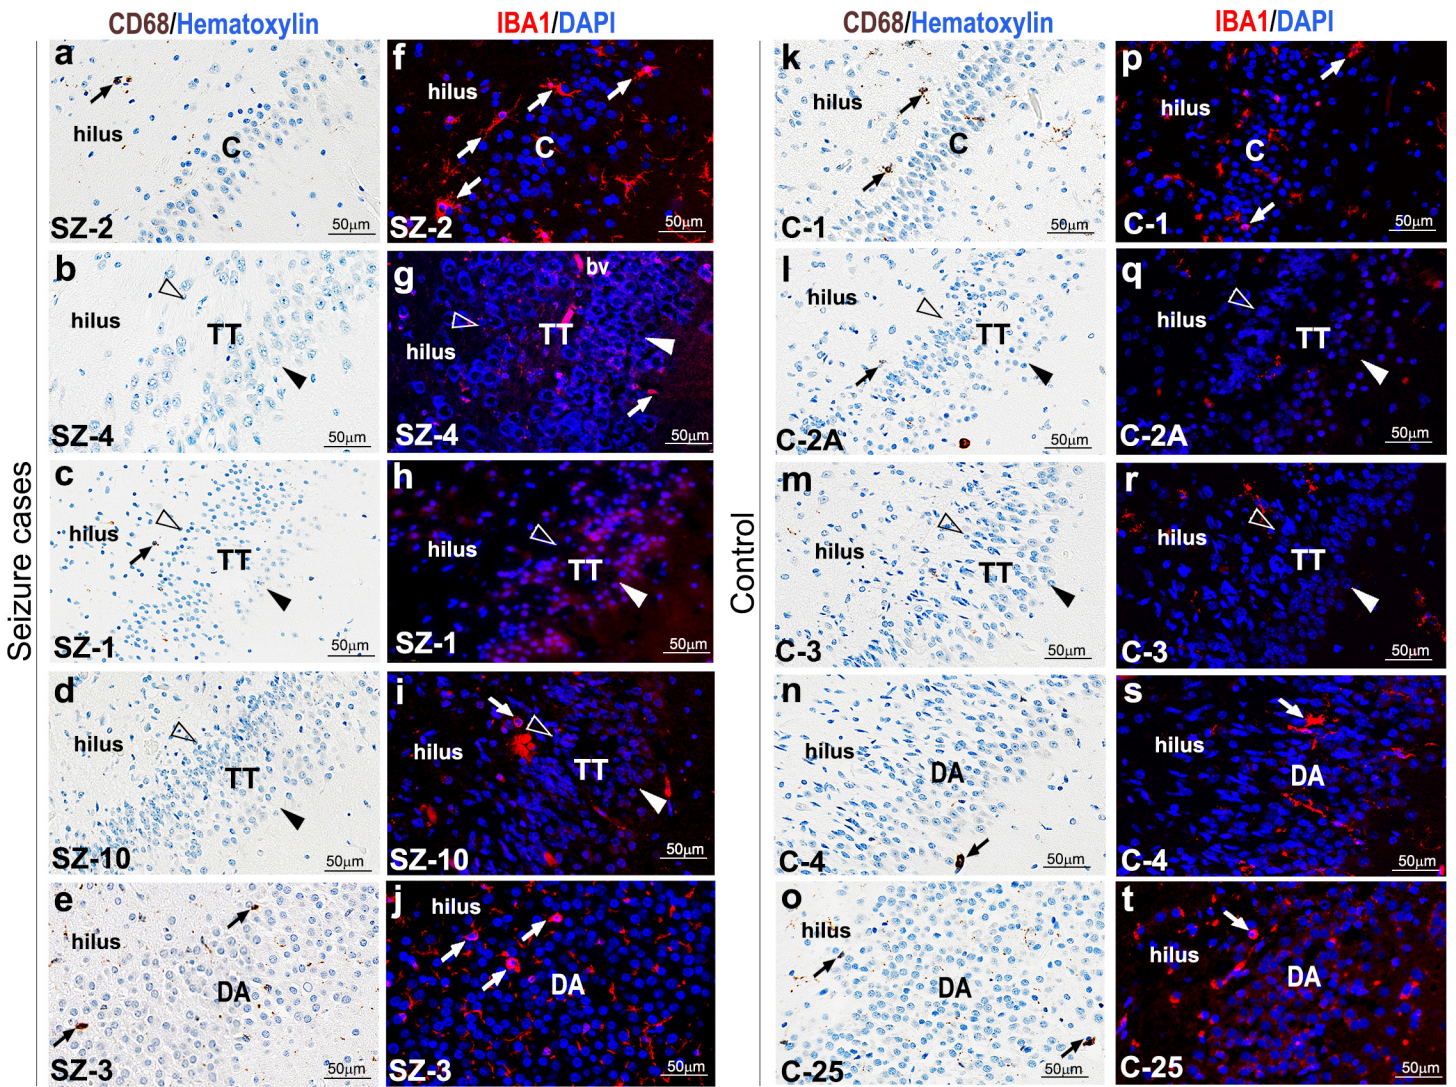

Supplementary Fig. 4



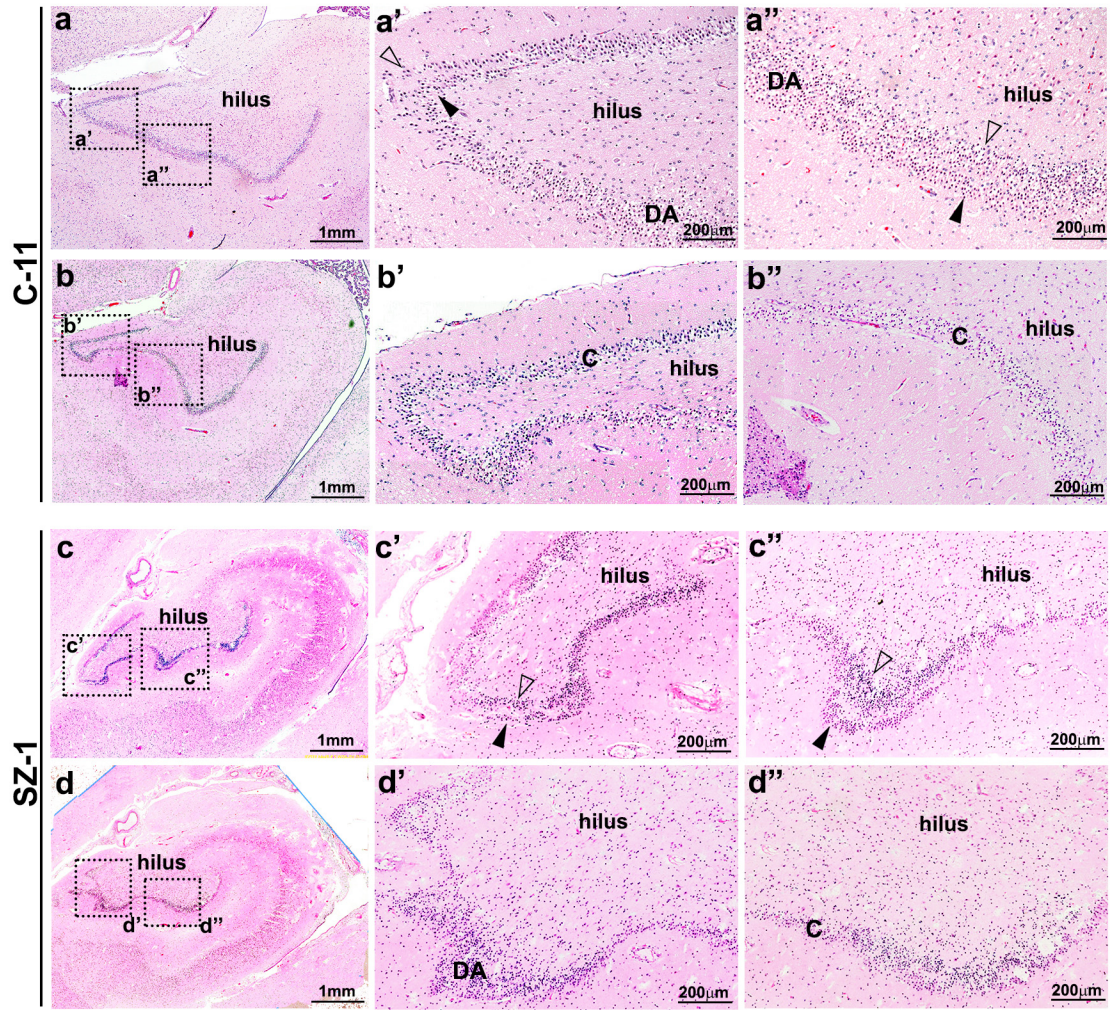

Supplementary Fig. 5

# C-20

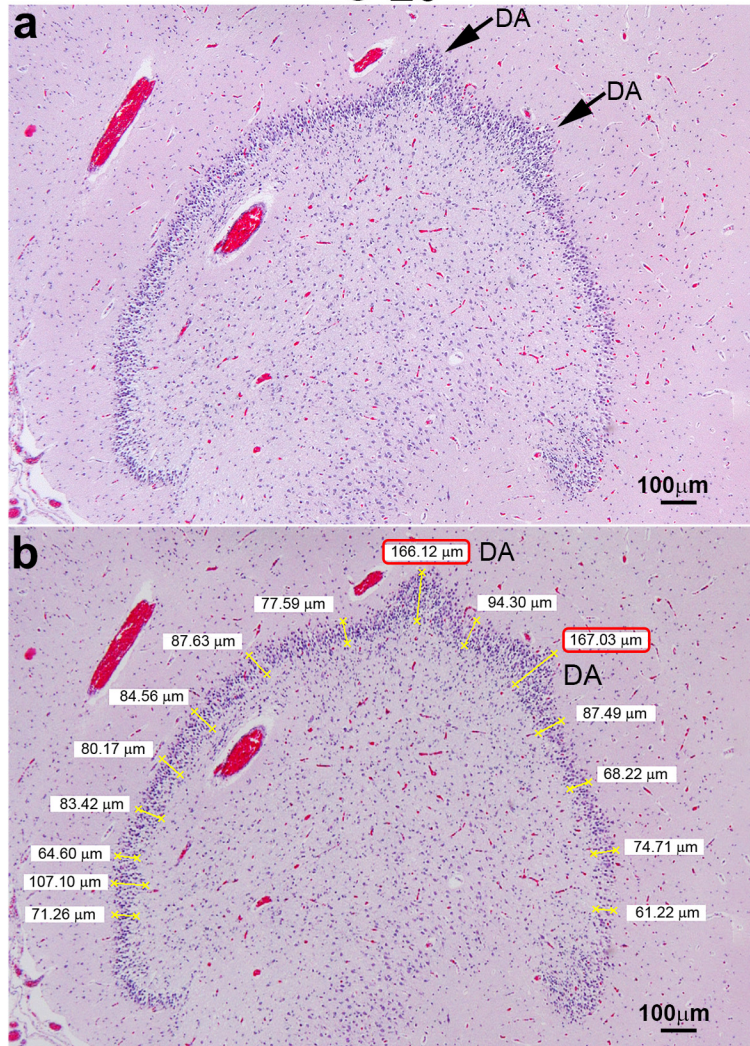

Mean Width including DA =  $91.7 \pm 31.5 \mu\text{m}$   
Mean Width excluding DA =  $80.17 \pm 12.7 \mu\text{m}$

## Supplementary Fig. 6
